# Supplementary material for: Heatwave magnitude quantization and impact factors analysis over the Tibetan Plateau
Source: Research Square preprint supplement (doi:10.21203/rs.3.rs-4738682/v1), 2024-08-23
Supplement: Supplementary file 1 [file a8331846eae0b419755eb91c.docx]

**Table 1** **Multi-year mean of HWI, HWD, HWF, and HWT for different subregions during all 44 years (1979-2022), the first 22 years (1979-2000), and the recent 22 years.**

| **Subregions** | **All 44 years** | | | | **First 22 years** | | | | **Recent 22 years** | | | |
| --- | --- | --- | --- | --- | --- | --- | --- | --- | --- | --- | --- | --- |
| **HWI** | **HWD** | **HWF** | **HWT** | **HWI** | **HWD** | **HWF** | **HWT** | **HWI** | **HWD** | **HWF** | **HWT** |
| PA | 30.75 | 4.44 | 3.92 | 18.80 | 22.17 | 4.17 | 3.03 | 14.06 | 39.33 | 4.71 | 4.80 | 23.54 |
| WK | 30.39 | 4.13 | 3.89 | 17.27 | 21.64 | 3.90 | 3.18 | 13.33 | 39.13 | 4.35 | 4.61 | 21.21 |
| EK | 25.26 | 3.68 | 3.38 | 14.13 | 17.38 | 3.56 | 2.60 | 10.38 | 33.15 | 3.81 | 4.17 | 17.88 |
| QL | 23.00 | 3.64 | 3.21 | 13.28 | 14.79 | 3.43 | 2.25 | 9.04 | 31.21 | 3.84 | 4.17 | 17.52 |
| IT | 31.90 | 4.55 | 3.77 | 18.89 | 22.11 | 4.23 | 2.90 | 13.70 | 41.69 | 4.86 | 4.64 | 24.08 |
| ST | 28.31 | 4.12 | 3.62 | 16.62 | 17.80 | 3.75 | 2.58 | 11.18 | 38.82 | 4.49 | 4.67 | 22.06 |
| HK | 32.14 | 4.48 | 3.67 | 19.07 | 16.53 | 3.75 | 2.19 | 10.28 | 47.75 | 5.21 | 5.16 | 27.87 |
| KA | 33.34 | 4.48 | 3.78 | 19.11 | 21.19 | 3.91 | 2.72 | 12.61 | 45.49 | 5.05 | 4.85 | 25.60 |
| WH | 29.94 | 4.54 | 3.77 | 19.33 | 17.64 | 3.92 | 2.55 | 11.97 | 42.23 | 5.16 | 4.98 | 26.69 |
| CH | 23.54 | 4.40 | 3.43 | 16.90 | 15.95 | 4.12 | 2.39 | 11.35 | 31.13 | 4.68 | 4.47 | 22.44 |
| EH | 19.74 | 3.99 | 3.24 | 15.04 | 11.30 | 3.57 | 2.04 | 9.03 | 28.17 | 4.42 | 4.44 | 21.05 |
| HD | 21.82 | 4.02 | 3.72 | 16.50 | 16.11 | 3.81 | 2.80 | 12.13 | 27.52 | 4.23 | 4.63 | 20.88 |

Note: The full name for each subregion correspond separately: PA, Pamir; WK, West Kun Lun; EK, East Kun Lun; QL, Qilian Mountains; IT, Inner Tibetan Plateau; ST, Southeast Tibetan Plateau; HK, Hindu Kush; KA, Karakoram; WH, West Himalaya; CH, Central Himalaya; EH, East Himalaya; HD, Hengduan Mountains.

The units of heatwave indicators are HWI: ℃/count, HWD: days/count, HWF: count, and HWT: days.

**Table 2** **The HWI, HWD, HWF, and HWT trends for different subregions during all 44 years (1979-2022), the first 22 years (1979-2000), and the recent 22 years (2001-2022).**

| **Subregions** | **All 44 years** | | | | **First 22 years** | | | | **Recent 22 years** | | | |
| --- | --- | --- | --- | --- | --- | --- | --- | --- | --- | --- | --- | --- |
| **HWI** | **HWD** | **HWF** | **HWT** | **HWI** | **HWD** | **HWF** | **HWT** | **HWI** | **HWD** | **HWF** | **HWT** |
| PA | 7.52 | 0.27 | 0.75 | 4.35 | 6.21 | 0.34 | 0.62 | 4.14 | 11.99 | 0.53 | 0.64 | 5.90 |
| WK | 7.95 | 0.24 | 0.77 | 4.11 | 5.54 | 0.30 | 0.87 | 4.59 | 19.67 | 0.45 | 1.58 | 9.16 |
| EK | 5.85 | 0.15 | 0.66 | 3.15 | 2.53 | 0.37 | 0.16 | 1.70 | 13.07 | 0.31 | 1.20 | 6.19 |
| QL | 6.77 | 0.21 | 0.89 | 3.91 | 6.97 | 0.63 | 0.69 | 4.17 | 10.96 | 0.34 | 1.22 | 6.33 |
| IT | 8.15 | 0.33 | 0.78 | 4.77 | 1.28 | 0.05 | 0.18 | 1.20 | 25.03 | 0.82 | 1.98 | 13.99 |
| ST | 7.22 | 0.25 | 0.86 | 4.27 | 0.41 | 0.00 | 0.14 | 0.62 | 12.34 | 0.23 | 1.30 | 7.26 |
| HK | 9.97 | 0.62 | 1.09 | 6.01 | 8.71 | 1.08 | 0.92 | 5.30 | 2.54 | 0.38 | 0.17 | 2.40 |
| KA | 9.57 | 0.48 | 0.92 | 5.30 | 10.60 | 0.88 | 1.24 | 6.66 | 9.34 | 0.30 | 0.64 | 4.87 |
| WH | 8.94 | 0.48 | 1.04 | 5.92 | 6.69 | 0.59 | 1.07 | 5.15 | 14.73 | 0.41 | 1.35 | 9.75 |
| CH | 5.16 | 0.32 | 0.83 | 4.39 | 4.14 | 0.58 | 0.51 | 3.52 | 9.69 | 0.46 | 1.42 | 8.41 |
| EH | 6.33 | 0.33 | 1.01 | 4.92 | 2.45 | 0.33 | 0.36 | 2.19 | 14.05 | 0.49 | 1.94 | 10.75 |
| HD | 5.21 | 0.14 | 0.90 | 4.23 | 0.00 | -0.20 | 0.15 | 0.30 | 15.45 | 0.49 | 2.43 | 12.42 |

Note: The units of the trends of heatwave indicators are HWI: ℃/count/decade, HWD: days/count/decade, HWF: counts/decade, and HWT: days/decade.
